# Supplementary material for: Association between vaccine preventable diseases in children and improved sanitation following a nationwide sanitation campaign in India: an ecological analysis
Source: PubMed Central journal article supplement — BMJ Open. 2022 Apr 19;12(4):e052937. doi: 10.1136/bmjopen-2021-052937 (PMC9021782; doi:10.1136/bmjopen-2021-052937), 2022-04-19
Supplement: bmjopen-2021-052937supp001.pdf [file bmjopen-2021-052937supp001.pdf]

## Appendix

**Appendix Table A.1:** Distribution of mean of change in VPDs (Diphtheria, Pertussis, Tetanus, Measles) per 1000 u5 children by 5-unit increments of their respective percentile distributions (532 districts in India, change estimated as the difference between year 2016 and year 2013 values)

| Percentile       | Diphtheria | Pertussis | Tetanus | Measles |
|------------------|------------|-----------|---------|---------|
| 1 <sup>st</sup>  | -42.6      | -25.5     | -12.6   | -165.8  |
| 5 <sup>th</sup>  | -6.6       | -3.1      | -2.2    | -65.3   |
| 10 <sup>th</sup> | -2.3       | -0.8      | -0.5    | -33.2   |
| 25 <sup>th</sup> | 0          | 0         | 0       | -13.6   |
| 50 <sup>th</sup> | 0          | 0         | 0       | -0.1    |
| 75 <sup>th</sup> | 0          | 0         | 0       | 4.5     |
| 90 <sup>th</sup> | 0          | 0         | 0       | 20.8    |
| 95 <sup>th</sup> | 1.1        | 0         | 0.1     | 43.9    |
| 99 <sup>th</sup> | 14.4       | 3.1       | 5.3     | 135     |

**Appendix Table A.2:** Linear regression predicting Change in Measles as a function of Change in percentage of households with toilets, controlling for change in other covariates and baseline (pre-SBM) annual incidence of measles, by 6 administrative regions of India.

| Covariates                                                                    | Central        |                 | Eastern     |                 | North Eastern  |                 | Northern    |                | Southern    |                 | Western     |                 |
|-------------------------------------------------------------------------------|----------------|-----------------|-------------|-----------------|----------------|-----------------|-------------|----------------|-------------|-----------------|-------------|-----------------|
|                                                                               | Coefficient    | 95% CI          | Coefficient | 95% CI          | Coefficient    | 95% CI          | Coefficient | 95% CI         | Coefficient | 95% CI          | Coefficient | 95% CI          |
| <b>Change in percentage of households with toilets</b>                        | <b>-1.223*</b> | [-2.390 -0.057] | 0.006       | [-0.503 0.515]  | <b>-0.475*</b> | [-0.882 -0.068] | 0.331       | [-0.226 0.887] | -0.317      | [-0.992 0.357]  | 0.202       | [-0.544 0.949]  |
| Change in percentage of households with electricity                           | 0.526          | [-0.067 1.119]  | -0.300*     | [-0.572 -0.029] | -0.032         | [-0.452 0.388]  | -0.150      | [-0.617 0.317] | 0.612       | [-1.432 2.656]  | -0.268      | [-2.041 1.505]  |
| Change in percentage of households with clean drinking water                  | -0.428         | [-2.107 1.250]  | 0.381       | [-0.122 0.884]  | 0.275          | [-0.401 0.951]  | -0.270      | [-0.812 0.271] | -0.095      | [-0.415 0.224]  | -0.636      | [-1.352 0.081]  |
| Change in percentage of households with clean cooking fuel                    | 0.545          | [-0.303 1.393]  | -1.094*     | [-2.042 -0.146] | -0.216         | [-0.892 0.459]  | -0.113      | [-0.469 0.242] | -0.220      | [-0.492 0.052]  | -0.162      | [-0.735 0.410]  |
| Change in percentage of women with 10 <sup>th</sup> grade or higher education | 3.006**        | [0.762 5.250]   | 1.834       | [-0.657 4.325]  | -0.252         | [-1.100 0.595]  | -0.127      | [-1.143 0.889] | -0.329      | [-0.818 0.160]  | 0.732       | [-0.226 1.690]  |
| Change in percentage of ≤ 1 year old children with measles vaccination        | -0.233         | [-1.039 0.573]  | 0.238       | [-0.363 0.838]  | -0.223         | [-0.523 0.078]  | -0.131      | [-0.439 0.176] | 0.311*      | [0.012 0.610]   | -0.350      | [-1.409 0.709]  |
| Change in percentage of births in hospitals                                   | -0.087         | [-0.740 0.565]  | 0.814*      | [0.033 1.595]   | 0.205          | [-0.239 0.648]  | -0.312      | [-0.929 0.305] | 0.264       | [-0.479 1.007]  | 0.254       | [-0.936 1.444]  |
| Baseline (pre-SBM) Measles per 1000 u5 children                               | -0.967***      | [-1.156 -0.778] | -0.798***   | [-0.910 -0.685] | -0.291         | [-0.629 0.048]  | -0.449      | [-1.145 0.247] | -0.736***   | [-0.975 -0.496] | -0.810***   | [-1.161 -0.459] |
| N                                                                             | 121            |                 | 107         |                 | 80             |                 | 85          |                | 103         |                 | 36          |                 |

\* p&lt;0.05, \*\* p&lt;0.01, \*\*\* p&lt;0.001

**Appendix Table A.3:** Mean of change in (1) measles per 1000 u5 children and (2) percentage of households with toilets, by India's administrative regions.

| Region        | Mean change in measles per 1000 u5 children | Mean change in district-level percentage of households with toilets |
|---------------|---------------------------------------------|---------------------------------------------------------------------|
| central       | -7.44                                       | 7.97                                                                |
| eastern       | -14.68                                      | 5.50                                                                |
| north eastern | -0.60                                       | 9.93                                                                |
| northern      | -0.96                                       | 7.76                                                                |
| southern      | -3.91                                       | 4.23                                                                |
| western       | 5.80                                        | 0.57                                                                |

**Appendix Figure A.1:** Average marginal effect (with 95% Confidence Intervals) of change in percentage of household with toilets on counts of u5 measles cases per district in India

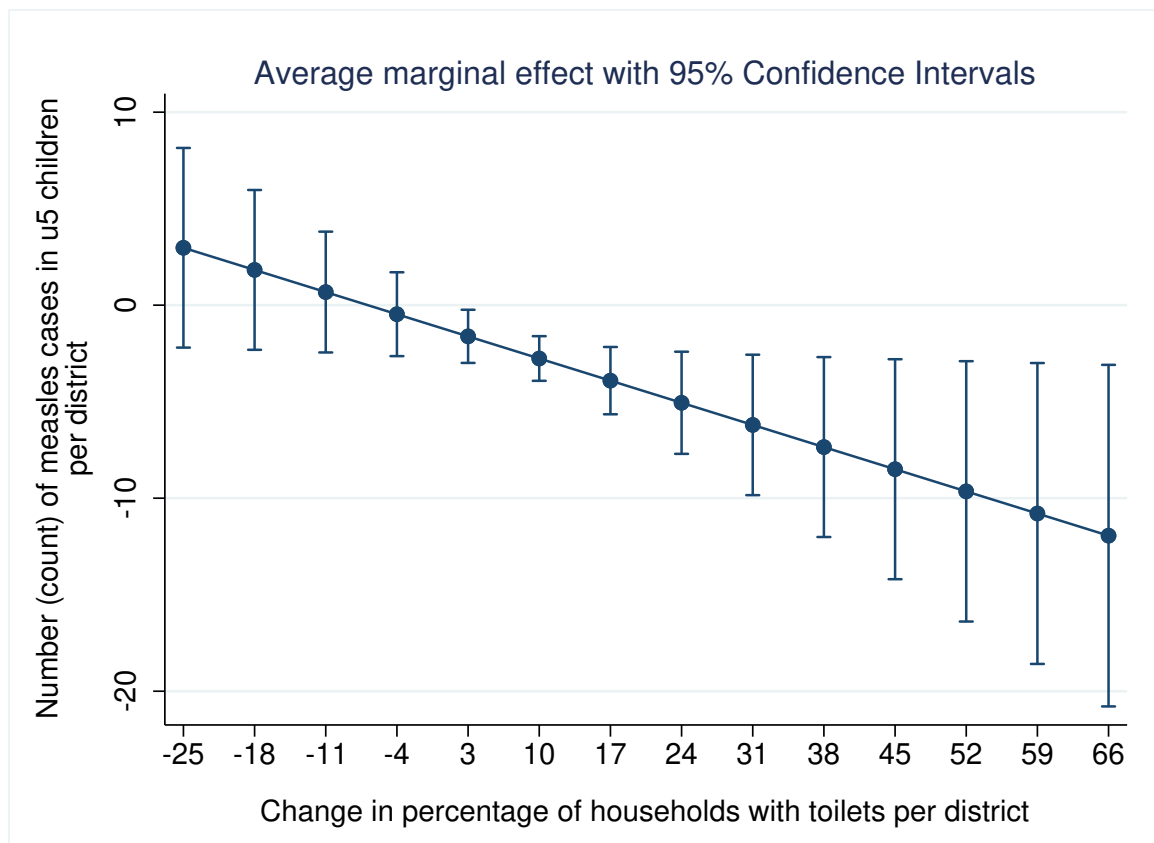

**Appendix Table A.4:** Linear regression predicting Change in Measles as a function of Change in percentage of households with toilets, controlling for change in other covariates including vitamin A supplementation among u5 children and baseline (pre-SBM) annual incidence of measles. (N= 532).

|                                                                            | Coefficient    | 95% Confidence Interval |               |
|----------------------------------------------------------------------------|----------------|-------------------------|---------------|
| <b>Change in percentage of households with toilets</b>                     | <b>-0.365*</b> | <b>-0.675</b>           | <b>-0.054</b> |
| Change in percentage of households with electricity                        | 0.149          | -0.007                  | 0.306         |
| Change in percentage of households with clean drinking water               | -0.197         | -0.435                  | 0.041         |
| Change in percentage of households with clean cooking fuel                 | -0.153         | -0.406                  | 0.099         |
| Change in percentage of women with 10th grade or higher education          | 0.508          | -0.024                  | 1.040         |
| Change in percentage of ≤ 1 year old children with measles vaccination     | -0.065         | -0.277                  | 0.148         |
| Change in percentage of births in hospitals                                | 0.201          | -0.066                  | 0.469         |
| Change in percentage of u5 children who received Vitamin A supplementation | -0.190*        | -0.365                  | -0.016        |
| Baseline (pre-SBM) Measles per 1000 u5 children                            | -0.768***      | -0.898                  | -0.638        |

\* p<0.05, \*\* p<0.01, \*\*\* p<0.001

**Appendix Table A.5:** Relation between change in percentage of households with toilets, change in stunting among under 5 years old children and their effect on change in measles among under 5 years old children estimated using structural equation modelling (N = 532).

| Structural Equation Modelling Step 1: <i>Direct effect</i> of change in percentage of households with toilets on change in percentage of u5 children who are stunted.                                        |                |                          |               |
|--------------------------------------------------------------------------------------------------------------------------------------------------------------------------------------------------------------|----------------|--------------------------|---------------|
| Outcome = Change in percentage of u5 children who are stunted                                                                                                                                                | Coefficient    | 95% Confidence intervals |               |
| <b>Change in percentage of households with toilets</b>                                                                                                                                                       | <b>-0.053*</b> | <b>-0.104</b>            | <b>-0.002</b> |
| Change in percentage of households with electricity                                                                                                                                                          | -0.114         | -0.484                   | 0.256         |
| Change in percentage of households with clean drinking water                                                                                                                                                 | -0.081*        | -0.161                   | -0.001        |
| Change in percentage of households with clean cooking fuel                                                                                                                                                   | 0.014          | -0.062                   | 0.089         |
| Change in percentage of women with 10th grade or higher education                                                                                                                                            | -0.214**       | -0.329                   | -0.100        |
| Change in percentage of ≤ 1 year old children with measles vaccination                                                                                                                                       | -0.035         | -0.091                   | 0.021         |
| Change in percentage of births in hospitals                                                                                                                                                                  | 0.042          | -0.036                   | 0.120         |
| Change in percentage of u5 children who received Vitamin A supplementation                                                                                                                                   | -0.028         | -0.069                   | 0.012         |
|                                                                                                                                                                                                              |                |                          |               |
| Structural Equation Modelling Step 2: <i>Direct effect</i> of change in percentage of households with toilets and change in percentage of u5 children who are stunted on change in measles among u5 children |                |                          |               |
| Outcome = Change in measles among u5 children                                                                                                                                                                | Coefficient    | 95% Confidence intervals |               |
| <b>Change in percentage of u5 children who are stunted</b>                                                                                                                                                   | <b>0.012*</b>  | <b>0.023</b>             | <b>0.002</b>  |
| <b>Change in percentage of households with toilets</b>                                                                                                                                                       | <b>-0.320*</b> | <b>-0.617</b>            | <b>-0.044</b> |
| Change in percentage of households with electricity                                                                                                                                                          | 0.147          | 0.008                    | 0.286         |
| Change in percentage of households with clean drinking water                                                                                                                                                 | -0.211         | 0.537                    | 0.115         |
| Change in percentage of households with clean cooking fuel                                                                                                                                                   | -0.168         | 0.477                    | 0.140         |
| Change in percentage of women with 10th grade or higher education                                                                                                                                            | 0.502          | 0.033                    | 0.970         |
| Change in percentage of ≤ 1 year old children with measles vaccination                                                                                                                                       | -0.073         | 0.302                    | 0.155         |
| Change in percentage of births in hospitals                                                                                                                                                                  | 0.239          | 0.081                    | 0.558         |
| Change in percentage of u5 children who received Vitamin A supplementation                                                                                                                                   | -0.203         | -0.368                   | -0.038        |

|                                                                                                                                                                                                                 |                |                          |               |
|-----------------------------------------------------------------------------------------------------------------------------------------------------------------------------------------------------------------|----------------|--------------------------|---------------|
| Baseline (pre-SBM) Measles per 1000 u5 children                                                                                                                                                                 | -0.772***      | 0.842                    | -0.701        |
| Structural Equation Modelling Step 3: <i>Indirect effect</i> of change in percentage of households with toilets on change in measles among u5 children that passes through change in stunting among u5 children |                |                          |               |
| Outcome = Change in measles among u5 children                                                                                                                                                                   | Coefficient    | 95% Confidence intervals |               |
| <b>Change in percentage of households with toilets</b>                                                                                                                                                          | <b>-0.042*</b> | <b>-0.081</b>            | <b>-0.004</b> |
| Change in percentage of households with electricity                                                                                                                                                             | -0.023         | -0.065                   | 0.019         |
| Change in percentage of households with clean drinking water                                                                                                                                                    | 0.023          | -0.020                   | 0.065         |
| Change in percentage of households with clean cooking fuel                                                                                                                                                      | 0.008          | -0.009                   | 0.025         |
| Change in percentage of women with 10th grade or higher education                                                                                                                                               | 0.002          | -0.013                   | 0.016         |
| Change in percentage of ≤ 1 year old children with measles vaccination                                                                                                                                          | 0.004          | -0.006                   | 0.015         |
| Change in percentage of births in hospitals                                                                                                                                                                     | 0.005          | -0.008                   | 0.019         |
| Change in percentage of u5 children who received Vitamin A supplementation                                                                                                                                      | -0.004         | -0.012                   | 0.005         |
| Baseline (pre-SBM) Measles per 1000 u5 children                                                                                                                                                                 | (no path)      | (no path)                | (no path)     |
| Structural Equation Modelling Step 4: <i>Total effect</i> of change in percentage of households with toilets on change in measles among u5 children (if there is no mediator in our model)                      |                |                          |               |
| Outcome = Change in measles among u5 children                                                                                                                                                                   | Coefficient    | 95% Confidence intervals |               |
| <b>Change in percentage of u5 children who are stunted</b>                                                                                                                                                      | <b>0.012*</b>  | <b>0.023</b>             | <b>0.002</b>  |
| <b>Change in percentage of households with toilets</b>                                                                                                                                                          | <b>-0.362*</b> | <b>-0.617</b>            | <b>-0.044</b> |
| Change in percentage of households with electricity                                                                                                                                                             | 0.124          | -0.024                   | 0.271         |
| Change in percentage of households with clean drinking water                                                                                                                                                    | -0.188         | -0.513                   | 0.136         |
| Change in percentage of households with clean cooking fuel                                                                                                                                                      | -0.161         | -0.468                   | 0.147         |
| Change in percentage of women with 10th grade or higher education                                                                                                                                               | -0.503         | -0.168                   | 0.161         |
| Change in percentage of ≤ 1 year old children with measles vaccination                                                                                                                                          | -0.069         | -0.298                   | 0.159         |
| Change in percentage of births in hospitals                                                                                                                                                                     | 0.244          | -0.075                   | 0.563         |

|                                                                            |           |        |        |
|----------------------------------------------------------------------------|-----------|--------|--------|
| Change in percentage of u5 children who received Vitamin A supplementation | -0.207    | -0.372 | -0.041 |
| Baseline (pre-SBM) Measles per 1000 u5 children                            | -0.727*** | -0.842 | -0.701 |

\* p<0.05, \*\* p<0.01, \*\*\* p<0.001

Step 4 in Table A.5 shows that the total effect coefficient of change in percentage of households with toilets on change in measles among u5 children is -0.362. This is the effect or association we would observe if there was no mediator in our analytic model. The direct effect coefficient of change in percentage of households with toilets on change in measles among u5 children is -0.320, which is smaller than the total effect coefficient (Step 2). The indirect effect of change in percentage of households with toilets on change in measles among u5 children that passes through change in percentage of u5 children who are stunted is -0.042 (Step 3), indicating that stunting may only serve as a partial mediator in this analysis.

We can also interpret results from our structural equation modelling as ratios:

Proportion of total effect mediated =  $-0.042/-0.362 = 0.116$  or about 12%. Put simply, about 12% of the total effect of change in percentage of households with toilets on change in measles among u5 children appears to be mediated by change in stunting among u5 children over our study period.

**Appendix table A.6:** Linear regression predicting log transformed change in measles as a function of change in percentage of households with toilets, controlling for change in other covariates and baseline (pre-SBM) annual incidence of measles (N = 532).

|                                                                             | Coefficient    | 95% confidence intervals |               |
|-----------------------------------------------------------------------------|----------------|--------------------------|---------------|
| <b>Change in percentage of households with toilets</b>                      | <b>-0.013*</b> | <b>-0.023</b>            | <b>-0.003</b> |
| Change in percentage of households with electricity                         | 0.004          | -0.001                   | 0.009         |
| Change in percentage of households with clean drinking water                | -0.002         | -0.004                   | 0.000         |
| Change in percentage of households with clean cooking fuel                  | -0.006         | -0.014                   | 0.002         |
| Change in percentage of women with 10th grade or higher education           | 0.003          | -0.003                   | 0.009         |
| Change in percentage of $\leq 1$ year old children with measles vaccination | -0.001         | -0.003                   | 0.001         |
| Change in percentage of births in hospitals                                 | 0.002          | -0.002                   | 0.005         |
| Change in percentage of u5 children who received Vitamin A supplementation  | -0.003         | -0.008                   | 0.003         |
| Baseline (pre-SBM) Measles per 1000 u5 children                             | -0.027***      | -0.042                   | -0.011        |

\*  $p < 0.05$ , \*\*  $p < 0.01$ , \*\*\*  $p < 0.001$



**Appendix Table A.7:** Linear regression predicting z-scaled change in measles as a function of change in percentage of households with toilets, controlling for change in other covariates and baseline (pre-SBM) annual incidence of measles (restricted to outcome distribution within  $\pm 3$  standard deviations or z scores of -3 to +3). (N = 509)

|                                                                             | Coefficient    | 95% confidence intervals |               |
|-----------------------------------------------------------------------------|----------------|--------------------------|---------------|
| <b>Change in percentage of households with toilets</b>                      | <b>-0.007*</b> | <b>-0.011</b>            | <b>-0.002</b> |
| Change in percentage of households with electricity                         | 0.001          | -0.002                   | 0.004         |
| Change in percentage of households with clean drinking water                | -0.002         | -0.006                   | 0.003         |
| Change in percentage of households with clean cooking fuel                  | -0.004         | -0.008                   | 0.001         |
| Change in percentage of women with 10th grade or higher education           | 0.000          | -0.008                   | 0.008         |
| Change in percentage of $\leq 1$ year old children with measles vaccination | -0.001         | -0.006                   | 0.003         |
| Change in percentage of births in hospitals                                 | 0.006          | 0.001                    | 0.011         |
| Change in percentage of u5 children who received Vitamin A supplementation  | -0.002         | -0.006                   | 0.002         |
| Baseline (pre-SBM) Measles per 1000 u5 children                             | -0.027***      | -0.035                   | -0.018        |

\*  $p < 0.05$ , \*\*  $p < 0.01$ , \*\*\*  $p < 0.001$
